# Supplementary material for: CC5 and CC8, Two Disintegrin Isoforms from Cerastes cerastes Snake Venom Decreased Inflammation Response In Vitro and In Vivo
Source: MDPI journal article supplement (doi:10.3390/ijms241512427), 2023-08-04
Supplement: s1 [file s1]

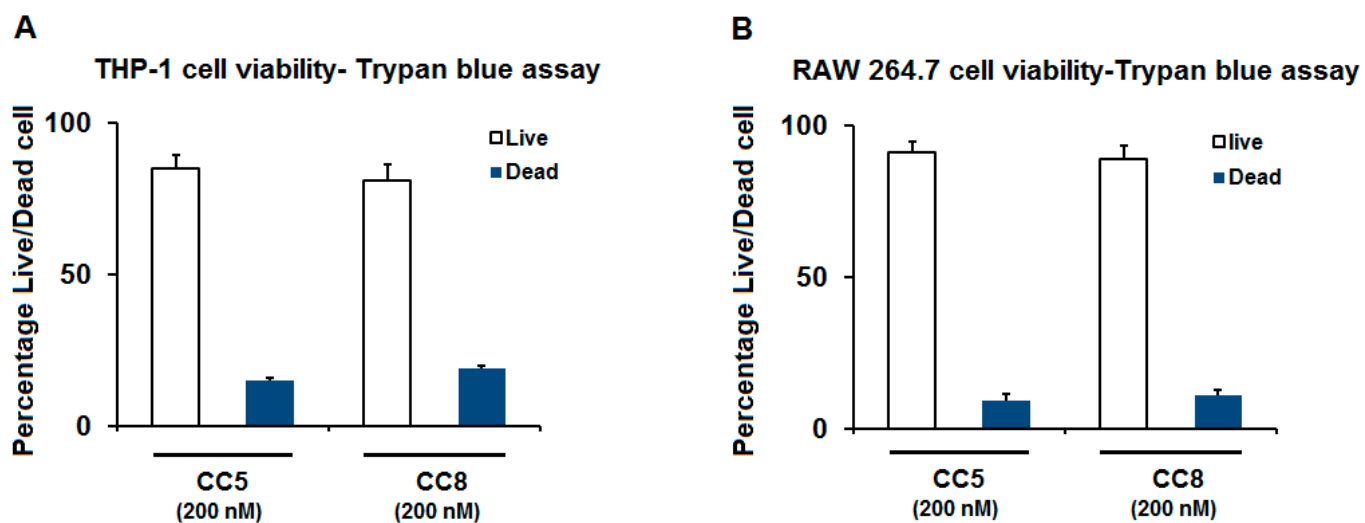

**Figure S1:** Trypan blue viability assay showing the percentage of live and dead cells treated with 200 nM of CC5 and CC8 in THP-1 cells (A) and RAW264.7 Cells (B) at 24 h. All values are expressed as mean  $\pm$  standard error of the mean (SEM) from three different samples.
